# Supplementary material for: The Asian tiger mosquito Aedes albopictus (Skuse) in Kosovo: First record
Source: PubMed Central journal article supplement (PMC8923454; doi:10.1371/journal.pone.0264300), 2022-03-15

The Asian tiger mosquito *Aedes albopictus* (Skuse) in Kosovo: first record

--Manuscript Draft--

|                                                                                                                                                                                                                                                                                                                             |                                                                                                                                                                                                                                                                                                                                                                                                                                                                                                                                                                                                                                                                                                                                                                                                                                                                                                                                                                                                                                                                                                                                                                                                                                                                                                                                                                                                                                                                                                                                                                                                          |
|-----------------------------------------------------------------------------------------------------------------------------------------------------------------------------------------------------------------------------------------------------------------------------------------------------------------------------|----------------------------------------------------------------------------------------------------------------------------------------------------------------------------------------------------------------------------------------------------------------------------------------------------------------------------------------------------------------------------------------------------------------------------------------------------------------------------------------------------------------------------------------------------------------------------------------------------------------------------------------------------------------------------------------------------------------------------------------------------------------------------------------------------------------------------------------------------------------------------------------------------------------------------------------------------------------------------------------------------------------------------------------------------------------------------------------------------------------------------------------------------------------------------------------------------------------------------------------------------------------------------------------------------------------------------------------------------------------------------------------------------------------------------------------------------------------------------------------------------------------------------------------------------------------------------------------------------------|
| <b>Manuscript Number:</b>                                                                                                                                                                                                                                                                                                   | PONE-D-21-33477                                                                                                                                                                                                                                                                                                                                                                                                                                                                                                                                                                                                                                                                                                                                                                                                                                                                                                                                                                                                                                                                                                                                                                                                                                                                                                                                                                                                                                                                                                                                                                                          |
| <b>Article Type:</b>                                                                                                                                                                                                                                                                                                        | Research Article                                                                                                                                                                                                                                                                                                                                                                                                                                                                                                                                                                                                                                                                                                                                                                                                                                                                                                                                                                                                                                                                                                                                                                                                                                                                                                                                                                                                                                                                                                                                                                                         |
| <b>Full Title:</b>                                                                                                                                                                                                                                                                                                          | The Asian tiger mosquito <i>Aedes albopictus</i> (Skuse) in Kosovo: first record                                                                                                                                                                                                                                                                                                                                                                                                                                                                                                                                                                                                                                                                                                                                                                                                                                                                                                                                                                                                                                                                                                                                                                                                                                                                                                                                                                                                                                                                                                                         |
| <b>Short Title:</b>                                                                                                                                                                                                                                                                                                         | <i>Aedes albopictus</i> in Kosovo: first record                                                                                                                                                                                                                                                                                                                                                                                                                                                                                                                                                                                                                                                                                                                                                                                                                                                                                                                                                                                                                                                                                                                                                                                                                                                                                                                                                                                                                                                                                                                                                          |
| <b>Corresponding Author:</b>                                                                                                                                                                                                                                                                                                | Enkelejda Velo, PhD<br>Institute of Public Health<br>Tirana, ALBANIA                                                                                                                                                                                                                                                                                                                                                                                                                                                                                                                                                                                                                                                                                                                                                                                                                                                                                                                                                                                                                                                                                                                                                                                                                                                                                                                                                                                                                                                                                                                                     |
| <b>Keywords:</b>                                                                                                                                                                                                                                                                                                            | Keywords: <i>Aedes albopictus</i> , tiger mosquito, invasive species.                                                                                                                                                                                                                                                                                                                                                                                                                                                                                                                                                                                                                                                                                                                                                                                                                                                                                                                                                                                                                                                                                                                                                                                                                                                                                                                                                                                                                                                                                                                                    |
| <b>Abstract:</b>                                                                                                                                                                                                                                                                                                            | The Asian tiger mosquito, <i>Aedes albopictus</i> , is an invasive mosquito species that is considered a potential vector of about 22 arboviruses, among which dengue, chikungunya and Zika. Despite the investigations carried out for this species' presence in Kosovo since 2017 under the VectorNet project framework, there has been no finding of <i>Ae. albopictus</i> . Here we report the first detection of <i>Aedes albopictus</i> on the territory of the Republic of Kosovo. The first finding in July 2020 was driven by a photo of adult mosquito published in social media by a citizen in one of the villages where the surveillance was ongoing. The subsequent field investigation in July 2020 confirmed the presence of adult mosquitoes by human landing catch and collection of eggs in ovitraps at the village of Zhur. Ovitrap with seed germination paper were deployed at the ground crossing Morina, at Pand and several villages near the border with Albania, and more apart from border crossings in Prizren. Monitoring was performed at 10 stations, 37 sampling stations in the Northern part of Kosovo, for 7 weeks with ovitraps and BG-Sentinel. Fifty-two out of 81 ovitraps were positive for the presence of <i>Ae. albopictus</i> . A total of 2711 eggs were collected. The citizen science platform Mosquito Alert (AIM Cost action) were presented to the local community to raise local participation and to have more evidence from the other areas. The evidence of the first finding of the Asian tiger mosquito is significant regarding public health. |
| <b>Order of Authors:</b>                                                                                                                                                                                                                                                                                                    | Nesade Muja-Bajraktari, PhD<br>Përparim Kadriaj, PhD<br>Ferdije Zhushi-Etemi, Prof.<br>Kurtesh Sherifi, Prof.<br>Bulent Alten, Prof.<br>Dusan Petrić, Prof.<br>Enkelejda Velo, PhD<br>Francis Schaffner, PhD                                                                                                                                                                                                                                                                                                                                                                                                                                                                                                                                                                                                                                                                                                                                                                                                                                                                                                                                                                                                                                                                                                                                                                                                                                                                                                                                                                                             |
| <b>Additional Information:</b>                                                                                                                                                                                                                                                                                              |                                                                                                                                                                                                                                                                                                                                                                                                                                                                                                                                                                                                                                                                                                                                                                                                                                                                                                                                                                                                                                                                                                                                                                                                                                                                                                                                                                                                                                                                                                                                                                                                          |
| <b>Question</b>                                                                                                                                                                                                                                                                                                             | <b>Response</b>                                                                                                                                                                                                                                                                                                                                                                                                                                                                                                                                                                                                                                                                                                                                                                                                                                                                                                                                                                                                                                                                                                                                                                                                                                                                                                                                                                                                                                                                                                                                                                                          |
| <b>Financial Disclosure</b><br><br>Enter a financial disclosure statement that describes the sources of funding for the work included in this submission. Review the <a href="#">submission guidelines</a> for detailed requirements. View published research articles from <a href="#">PLOS ONE</a> for specific examples. | The author(s) received no specific funding for this work.                                                                                                                                                                                                                                                                                                                                                                                                                                                                                                                                                                                                                                                                                                                                                                                                                                                                                                                                                                                                                                                                                                                                                                                                                                                                                                                                                                                                                                                                                                                                                |

This statement is required for submission and **will appear in the published article** if the submission is accepted. Please make sure it is accurate.

#### Unfunded studies

Enter: *The author(s) received no specific funding for this work.*

#### Funded studies

Enter a statement with the following details:

- Initials of the authors who received each award
- Grant numbers awarded to each author
- The full name of each funder
- URL of each funder website
- Did the sponsors or funders play any role in the study design, data collection and analysis, decision to publish, or preparation of the manuscript?
- **NO** - Include this sentence at the end of your statement: *The funders had no role in study design, data collection and analysis, decision to publish, or preparation of the manuscript.*
- **YES** - Specify the role(s) played.

\* typeset

#### Competing Interests

Use the instructions below to enter a competing interest statement for this submission. On behalf of all authors, disclose any [competing interests](#) that could be perceived to bias this work—acknowledging all financial support and any other relevant financial or non-financial competing interests.

This statement is **required** for submission and **will appear in the published article** if the submission is accepted. Please make sure it is accurate and that any funding sources listed in your Funding Information later in the submission form are also declared in your Financial Disclosure statement.

View published research articles from

The authors have declared that no competing interests exist.

[PLOS ONE](#) for specific examples.

**NO authors have competing interests**

Enter: *The authors have declared that no competing interests exist.*

**Authors with competing interests**

Enter competing interest details beginning with this statement:

*I have read the journal's policy and the authors of this manuscript have the following competing interests: [insert competing interests here]*

\* typeset

**Ethics Statement**

Enter an ethics statement for this submission. This statement is required if the study involved:

- Human participants
- Human specimens or tissue
- Vertebrate animals or cephalopods
- Vertebrate embryos or tissues
- Field research

Write "N/A" if the submission does not require an ethics statement.

General guidance is provided below. Consult the [submission guidelines](#) for detailed instructions. **Make sure that all information entered here is included in the Methods section of the manuscript.**

N/A

**Format for specific study types**

**Human Subject Research (involving human participants and/or tissue)**

- Give the name of the institutional review board or ethics committee that approved the study
- Include the approval number and/or a statement indicating approval of this research
- Indicate the form of consent obtained (written/oral) or the reason that consent was not obtained (e.g. the data were analyzed anonymously)

**Animal Research (involving vertebrate animals, embryos or tissues)**

- Provide the name of the Institutional Animal Care and Use Committee (IACUC) or other relevant ethics board that reviewed the study protocol, and indicate whether they approved this research or granted a formal waiver of ethical approval
- Include an approval number if one was obtained
- If the study involved *non-human primates*, add *additional details* about animal welfare and steps taken to ameliorate suffering
- If anesthesia, euthanasia, or any kind of animal sacrifice is part of the study, include briefly which substances and/or methods were applied

**Field Research**

Include the following details if this study involves the collection of plant, animal, or other materials from a natural setting:

- Field permit number
- Name of the institution or relevant body that granted permission

**Data Availability**

Authors are required to make all data underlying the findings described fully available, without restriction, and from the time of publication. PLOS allows rare exceptions to address legal and ethical concerns. See the [PLOS Data Policy](#) and [FAQ](#) for detailed information.

Yes - all data are fully available without restriction

A Data Availability Statement describing where the data can be found is required at submission. Your answers to this question constitute the Data Availability Statement and **will be published in the article**, if accepted.

**Important:** Stating 'data available on request from the author' is not sufficient. If your data are only available upon request, select 'No' for the first question and explain your exceptional situation in the text box.

Do the authors confirm that all data underlying the findings described in their manuscript are fully available without restriction?

**Describe where the data may be found in full sentences. If you are copying our sample text, replace any instances of XXX with the appropriate details.**

- If the data are **held or will be held in a public repository**, include URLs, accession numbers or DOIs. If this information will only be available after acceptance, indicate this by ticking the box below. For example: *All XXX files are available from the XXX database (accession number(s) XXX, XXX).*
- If the data are all contained **within the manuscript and/or Supporting Information files**, enter the following: *All relevant data are within the manuscript and its Supporting Information files.*
- If neither of these applies but you are able to provide **details of access elsewhere**, with or without limitations, please do so. For example:

*Data cannot be shared publicly because of [XXX]. Data are available from the XXX Institutional Data Access / Ethics Committee (contact via XXX) for researchers who meet the criteria for access to confidential data.*

*The data underlying the results presented in the study are available from (include the name of the third party*

All relevant data are within the manuscript and its Supporting Information files.

*and contact information or URL).*

- This text is appropriate if the data are owned by a third party and authors do not have permission to share the data.

\* typeset

Additional data availability information:

# The Asian tiger mosquito *Aedes albopictus* (Skuse) in Kosovo: first record

Nesade Muja-Bajraktari<sup>1</sup>, Përparim Kadriaj<sup>2</sup>, Ferdije Zhushi-Etemi<sup>1</sup>, Kurtesh Sherifi<sup>3</sup>,  
Bulent Alten<sup>4</sup>, Dusan Petrić<sup>5</sup>, Enkelejda Velo<sup>2\*</sup>, Francis Schaffner<sup>6</sup>

<sup>1</sup> *Department of Biology, Faculty of Mathematics and Natural Science, University "Hasan Prishtina", Prishtina, Republic of Kosovo.*

<sup>2</sup> *Control of Infectious Diseases Department, Institute of Public Health, Tirana, Albania.*

<sup>3</sup> *Department of Veterinary Medicine, Faculty of Agriculture and Veterinary, University "Hasan Prishtina", Prishtina, Republic of Kosovo.*

<sup>4</sup> *Hacettepe University, Faculty of Science, Biology Department, Ecology Division, VERG Laboratories, Ankara, Turkey.*

<sup>5</sup> *Laboratory for medical and veterinary entomology, Faculty of Agriculture, University of Novi Sad, Novi Sad, Serbia.*

<sup>6</sup> *Francis Schaffner Consultancy, Riehen, Switzerland.*

\*Corresponding author

E-mail: [keladikolli@yahoo.com](mailto:keladikolli@yahoo.com) (EV)

26 **Abstract**

27 The Asian tiger mosquito, *Aedes albopictus*, is an invasive mosquito species that is considered a  
28 potential vector of about 22 arboviruses, among which dengue, chikungunya and Zika. Despite  
29 the investigations carried out for this species' presence in Kosovo since 2017 under the  
30 VectorNet project framework, there has been no finding of *Ae. albopictus*. Here we report the  
31 first detection of *Aedes albopictus* on the territory of the Republic of Kosovo. The first finding in  
32 July 2020 was driven by a photo of adult mosquito published in social media by a citizen in one  
33 of the villages where the surveillance was ongoing. The subsequent field investigation in July  
34 2020 confirmed the presence of adult mosquitoes by human landing catch and collection of eggs  
35 in ovitraps at the village of Zhur. Ovitrap with seed germination paper were deployed at the  
36 ground crossing Morina, at Pand and several villages near the border with Albania, and more  
37 apart from border crossings in Prizren. Monitoring was performed at 10 stations, 37 sampling  
38 stations in the Northern part of Kosovo, for 7 weeks with ovitraps and BG-Sentinel. Fifty-two  
39 out of 81 ovitraps were positive for the presence of *Ae. albopictus*. A total of 2711 eggs were  
40 collected. The citizen science platform Mosquito Alert (AIM Cost action) were presented to the  
41 local community to raise local participation and to have more evidence from the other areas.  
42 The evidence of the first finding of the Asian tiger mosquito is significant regarding public  
43 health.

44

45 Keywords: *Aedes albopictus*, tiger mosquito, invasive species.

46

47

48

49

50

51

52



## 53 Introduction

54 *Aedes (Stegomyia) albopictus* (Skuse, 1894) (Diptera: Culicidae), commonly called the 'Asian  
55 tiger mosquito', is widespread throughout the tropical and subtropical regions of the world, partly  
56 also in the Mediterranean area. Many countries worldwide have been invaded by this species in  
57 last 30 years, including various regions in America and the Mediterranean.

58 It is currently considered one of the top 100 invasive species globally and the most invasive  
59 mosquito species [1], [2] . It is of medical importance due to its aggressive daytime human-biting  
60 behavior and vectorial competence being considered a severe threat to human health because of  
61 its potential to transmit 22 arboviruses in the family Flaviviridae (e.g., dengue, West Nile, yellow  
62 fever, Japanese encephalitis), Bunyaviridae (e.g., Rift Valley fever, Potosi, Cache Valley, and  
63 LaCrosse viruses), Togaviridae (e.g., chikungunya and Ross River virus) [3], [4], [5], [6], [7].  
64 After *Ae. aegypti*, *Ae. albopictus* is the secondary vector of dengue and dengue hemorrhagic  
65 fever [8]. In Europe, the species acts as a dengue vector and was incriminated as the only vector  
66 in the first European outbreak of chikungunya in northeastern Italy [9], dengue case in 2010 in  
67 Croatia [10], Zika and dengue cases in 2019 in France [11] ,[12], [13].

68 The first report of the tiger mosquito in the European continent was recorded in 1979 in Albania  
69 from Adhami and Murati 1987 [14]. It is thought to have been imported in shipments and  
70 containers from China in the mid-1970s (1975). Today, it is still distributed throughout the  
71 country [15], unfortunately is not banned only in Albania, but it is spread throughout the  
72 European continent with different ways. According to the existing data, this species was  
73 recorded in Montenegro [16], but there is no clear evidence either from neighboring Albania or  
74 from Italy. Actually, it was found in a used tire imported from Germany, in North Macedonia  
75 [17], and Serbia [18]. In Serbia, *Ae. albopictus* was intercepted in two districts in the western and  
76 southwestern part of the country. It has been present for the past nine years on the Croatian  
77 border (Batrovci, northwest of Serbia), [19] and on the Montenegro border (Dobrakovo,  
78 southwest of Serbia) since 2014 [20] .

79 Distribution models predict that *Ae. albopictus* will continue to expand depending on transport,  
80 environmental, and climatic changes [21], [22], [23].

81 This worldwide expansion is mostly due to dormant egg transport via the international trade in  
82 used tires [24] and shipments of the Asian plant “lucky bamboo” (*Dracaena* spp.) [ 25], [26] and

83 by public and private ground transport from heavily infested areas [23]. In 2017, a research for  
84 tiger mosquito in Kosovo was conducted at the borders with Macedonia and Albania within the  
85 VectorNet project framework. It resulted negative, although Kosovo has favorable conditions for  
86 the development of mosquito's species [27].

87 The primary objective of this study was to verify the tiger mosquito's presence in the territory of  
88 Kosovo and monitor its distribution. Here we report the first detection of *Ae. albopictus* in  
89 Kosovo.

90

## 91 **Materials and Methods**

### 92 **Study area**

93 The present study was conducted in the municipality of Prizren (42.121664 °N, 20.733329° E)  
94 and in Suhareka city (42.2248 °N, 20.2248°N) in July, August and September 2020. The  
95 Municipality of Prizren, respectively South Dukagjini, occupies the southern position in the  
96 Dukagjini Plain and southwestern Kosovo. The average altitude is about 450 m above sea level  
97 and includes nearly 640 km<sup>2</sup> of Kosovo's entire surface. Sharri mountain, Prizren plain and  
98 downstream of the Drini i Bardhe define the relief. Sharri mountain is also an essential  
99 geographical element, constitutes a watershed between the Adriatic Sea and the Aegean Sea  
100 basin. The main aspects of the climate are temperatures, precipitation and winds. Where based on  
101 these elements, the climate of this part of Kosovo is the Mediterranean. The city of Suhareka is  
102 located in the southern part of Kosovo. The average altitude is about 455 m. It is characterized by  
103 the developed hydrographic chain. Respectively there are a large number of rivers that pass  
104 through its territory.

105

### 106 **Collection and identification**

107 We used ovitraps considered the best method for detecting the females' presence via egg laying  
108 [28] and entomological aspirator (Genicco Srl,Item, Model: JF0825S1H—R) and BG-Sentinel  
109 traps, (<https://eu.biogents.com/wp-content/uploads/BG-Sentinel-2-Manual-EN-web.pdf>), to  
110 collect the adult mosquitoes. The ovitraps (500 ml black plastic cups) filled with tap water and a  
111 masonite strip (12.5 × 2.5 cm) and filter paper (38 x 9 cm) for egg deposition were used. The

112 plastic cups were modified by two holes punching 3 cm from the top of the cup to prevent water  
 113 overfilling. A total of 81 ovitraps were randomly distributed to 37 sampling stations (4-28  
 114 ovitraps) in 10 localities [Vërmicë (1), Zhur (3), Vlashnje (1), Prizren (2), Atmaxh (1),  
 115 Landovicë (1) and Suhareka (1)]. The aerial distance between the traps was minimum 100 m.  
 116 The ovitraps were placed on the ground, in shaded and accessible places, under vegetation, with  
 117 free space above at least 1 m, (Figure 1. a, b, c, d).

118

119 **Fig 1. Examples of traps operating at several mosquito collection sites.**

120 Ovitrap in: a Vlashnje (Tyre centres); b Zhur st.1 (Privat residence garden); c Prizren (Privat  
 121 residence garden); d Vërmicë (Restaurant veranda); e Odour-baited adult traps (BG-Sentinel)  
 122 Vermice (Restaurant garden); f Zhur st.1 (Resident garden); g Prizren (Resident garden).  
 123 Catching with aspirator: h Vlashnje (Tyre centres). Adults resting in: i Prizren (on the human  
 124 body); j Zhur (Plastic bottle); k Vlashnje (Inside the tire, resting on the surface water); l Zhur st.1  
 125 (First specimen of *Aedes albopictus* resting in the human body).

126

127 The ovitraps were left in the same place during the monitoring (10 days), then the filter paper  
 128 and masonite strips were collected from the sampling stations and were transferred to the  
 129 laboratory in Prishtina University, for identification. After having adults in the laboratory, the  
 130 adult mosquitoes were identified using the MosKeyTool [29]. Another technique used in this  
 131 research was aspiration from human bite for 30 minutes. This technique from human bite it was  
 132 used in three localities, (Zhur st.1, Vlashnje, Prizren, (Table 1) for 30 minutes, and two  
 133 volunteers were active for three entomological survive period (Fig 1 h, i, l).

134 **Table 1 Results of *Ae. albopictus* adult trapping with BG sentinel traps (BG) or handheld**  
 135 **electric aspirators (A) on the Prizreni municipality (July -September 2020).**

| Locality | Latitude (N) | Longitude (E) | Method of capture | Sampling area | Sampling period <sup>#</sup> | No. of adults         | No. of adults         |
|----------|--------------|---------------|-------------------|---------------|------------------------------|-----------------------|-----------------------|
|          |              |               |                   |               |                              | <i>Ae. albopictus</i> | <i>Cx.pipiens s.l</i> |

|           |           |           |    |                                    |                                  |               |             |
|-----------|-----------|-----------|----|------------------------------------|----------------------------------|---------------|-------------|
| Vërmicë   | 42.166918 | 20.572473 | BG | Restaurant garden with vegetations | 25-07-20<br>09-08-20<br>25-08-20 | 0<br>15<br>12 | 7<br>3<br>3 |
| Zhur st.1 | 42.16604  | 20.61539  | BG | Private residence (garden)         | 25-07-20<br>09-08-20<br>25-08-20 | 27<br>10<br>5 | 3<br>0<br>0 |
| Zhur st.2 | 42.161245 | 20.623351 | BG | Private residence (garden)         | 25-07-20<br>09-08-20<br>25-08-20 | 0<br>4<br>0   | 2<br>5<br>0 |
| Prizren   | 42.223997 | 20.734394 | BG | Private residence (garden)         | 25-07-20<br>09-08-20<br>25-08-20 | 0<br>2<br>3   | 2<br>5<br>7 |
| Zhur st.1 | 42.168164 | 20.615606 | A  | in the yard of house               | 01-08-20<br>10-08-20             | 1<br>3        | 0<br>0      |
| Vlashnje  | 42.198731 | 20.667758 | A  | tire centers                       | 03-09-20                         | 9             | 0           |
| Prizren   | 42.223997 | 20.734394 | A  | in the house with vegetable garden | 30-08-20<br>08-09-20             | 1<br>1        | 0<br>0      |

136 #Entomological survey period: I: 25–27 July 2020; II: 08–10 August 2020; III: 25–27 August 2020

137

138 In four localities (Vërmicë, Zhur st.1, Zhur st.2, Prizren) are used BG-Sentinel trap baited with  
139 BG lure and CO<sub>2</sub> ([https://eu.biogents.com/wp-content/uploads/BG-Sentinel-2-Manual-EN-](https://eu.biogents.com/wp-content/uploads/BG-Sentinel-2-Manual-EN-web.pdf)  
140 [web.pdf](https://eu.biogents.com/wp-content/uploads/BG-Sentinel-2-Manual-EN-web.pdf)). One BG-Sentinel trap was running for two consecutive nights every two weeks for  
141 three entomological survive periods (Table 1). The traps were set in the private houses' backyard  
142 (Fig 1. e, f, g). In total during this research are used 12 BG-Sentinel traps.

143

## 144 Results

145 The presence of *Ae. albopictus* is registered in Kosovo for the first time at the end of July 2020  
146 in Zhur village. The annoyance and bites that this strange black and white mosquito had caused  
147 to citizens during this period was why the citizens had reacted and photographed it. This  
148 information alarmed us that the tiger mosquito could be present in this area. After we captured

149 the first specimen and identified it in the laboratory in the Institute of Public Health in Tirana, we  
 150 concluded that it is *Ae. albopictus*. It was a male mosquito (Fig 2) found in a private residence  
 151 garden, and it was caught by hand.

152

153 **Fig 2. First specimen under the stereomicroscope (N.Muja-Bajraktari)**

154

155 In total, 2711 eggs were collected during this investigation in ten localities in the Prizreni Region  
 156 with 37 sampling stations (Fig 3).

157

158 **Fig 3. Distribution map of the ovitraps in Prizreni Region**

159

160 Table 1 shows placement of ovitraps and numbers of eggs collected on the Prizreni municipality.  
 161 Out of 14 from 37 sampling stations, no eggs were collected in the study area. We counted 440  
 162 eggs in Vërmicë, 1187 in Zhur, 139 in Vlashnje and 119 in Atmaxha, respectively.

163 In the city of Prizren we collected 786 eggs in three stations, while 40 eggs were counted in the  
 164 second locality in Truck Terminal, the periphery of the city of Prizren. We didn't have any egg in  
 165 the Landovica and Suhareka city (Table 2).

166 **Table 2. Placement of ovitraps and numbers of eggs collected on the Prizreni municipality,**  
 167 **with the respective identification number (ID), georeferenced, sampling area,**  
 168 **entomological survey and number of *Ae. albopictus* eggs found.**

| Localities | ID   | Sampling period <sup>#</sup> | Latitude (N) | Longitude (E) | Sampling area     | No.of eggs            |                        |
|------------|------|------------------------------|--------------|---------------|-------------------|-----------------------|------------------------|
|            |      |                              |              |               |                   | <i>Ae. albopictus</i> | <i>Ae. geniculatus</i> |
| Vërmicë    | 01/1 | I, II, III                   | 42.167278    | 20.577672     | Near the road     | 68                    | 63                     |
|            | 01/2 | I, II, III                   | 42.168801    | 20.582681     | Near the road     | 54                    | 0                      |
|            | 01/3 | I, II, III                   | 42.166918    | 20.572473     | Restaurant garden | 202                   | 0                      |
|            | 01/4 | I, II, III                   | 42.164574    | 20.567957     | Restaurant        | 112                   | 0                      |
|            | 01/5 | I, II, III                   | 42.163792    | 20.563543     | (veranda)         | 4                     | 0                      |

|                |      |                |           |           |                                            |      |    |
|----------------|------|----------------|-----------|-----------|--------------------------------------------|------|----|
| Total          |      |                |           |           |                                            | 440  | 63 |
| Zhur           | 02/1 | I, II, III     | 42.168164 | 20.615606 | Private residence (garden)                 | 346  | 0  |
|                | 02/2 | I, II, III     | 42.166543 | 20.607746 | Private residence (garden with pets)       | 196  | 0  |
|                | 02/3 | I, II, III     | 42.161062 | 20.622807 | Private residence (garden)                 | 168  | 48 |
|                | 02/4 | I, II, III     | 42.15736  | 20.618477 | Private residence (garden)                 | 62   | 0  |
|                | 03/1 | I, II, III     | 42.165116 | 20.623798 | Private residence (garden with vegetation) | 175  | 0  |
|                | 03/2 | I, II, III     | 42.161867 | 20.611347 | Private residence (garden)                 | 240  | 0  |
|                | 03/3 | I, II, III     | 42.223801 | 20.734074 | Private residence (garden)                 | 0    | 0  |
|                | 03/4 | I, II, III     | 42.15956  | 20.629809 | Private residence (garden)                 | 0    | 0  |
|                | 04/1 | IV             | 42.163807 | 20.632446 | Private residence (garden with chicken)    | 0    | 0  |
|                | 04/2 | IV             | 42.166677 | 20.627916 | Private residence (garden)                 | 0    | 0  |
|                | 04/3 | IV             | 42.15726  | 20.624888 | Near the forest                            | 0    | 0  |
| Total          |      |                |           |           |                                            | 1187 | 48 |
| Vlashnje       | 05/1 | II, III        | 42.200968 | 20.660929 | At the gas station near the road           | 76   | 0  |
|                | 05/2 | II, III        | 42.204696 | 20.659614 | Inside the tires                           | 30   | 0  |
|                | 05/3 | II, III        | 42.201094 | 20.664804 | Inside the tires                           | 33   | 0  |
|                | 05/4 | II, III        | 42.203438 | 20.668572 | Tire centers (garden)                      | 0    | 0  |
|                | 05/5 | II, III        | 42.200968 | 20.660929 | Tire centers (garden)                      | 0    | 0  |
| Total          |      |                |           |           |                                            | 139  | 0  |
| Prizren        | 06/1 | I, II, III, IV | 42.223288 | 20.741278 | Private residence (garden)                 | 438  | 4  |
|                | 06/2 | I, II, III     | 42.228297 | 20.739493 | Private residence (garden)                 | 176  | 0  |
|                | 06/3 | I, II, III     | 42.226967 | 20.729043 | Private residence (garden)                 | 172  | 0  |
|                | 06/4 | I, II, III     | 42.223801 | 20.734074 | Private residence (garden)                 | 0    | 0  |
| Total          |      |                |           |           |                                            | 786  | 4  |
| Truck Terminal | 07/1 | IV             | 42.249954 | 20.729769 | Truck terminal(garden)                     | 3    | 0  |
|                | 07/2 | IV             | 42.256972 | 20.733839 | Restaurant(garden)                         | 16   | 0  |

|           |      |                   |           |           |                                     |      |     |
|-----------|------|-------------------|-----------|-----------|-------------------------------------|------|-----|
|           | 07/3 | IV                | 42.254285 | 20.72666  | Near the road                       | 0    | 0   |
|           | 07/4 | IV                | 42.250268 | 20.721548 | Truck terminal<br>(garden)          | 21   | 0   |
| Total     |      |                   |           |           |                                     | 40   | 0   |
| Atmaxhë   | 08/1 | III               | 42.245329 | 20.699713 | At the gas station<br>near the road | 73   | 0   |
|           | 08/2 | III               | 42.24801  | 20.696709 | Near the car wash                   | 46   | 0   |
|           | 08/3 | III               | 42.243715 | 20.702604 | Hotel garden                        | 0    | 0   |
| Total     |      |                   |           |           |                                     | 119  | 0   |
| Landovicë | 09/1 | IV                | 42.259853 | 20.688001 | Supermarket<br>forecourt            | 0    | 0   |
|           | 09/2 | IV                | 42.264082 | 20.6842   | Near the road                       | 0    | 0   |
|           | 09/3 | IV                | 42.255862 | 20.684525 | Privat<br>residence(garden)         | 0    | 0   |
| Suharekë  | 10/1 | I, II, III,<br>IV | 42.363973 | 20.832803 | Bus station                         | 0    | 0   |
| Overtotal |      |                   |           |           |                                     | 2711 | 115 |

169 #Entomological survey period: I: 23–02 July 2020; II: 02–12 August 2020; III: 12–22 August 2020; IV:  
170 02–12 September 2020

171

172 Also, four adult **female** were collected with an aspirator in a yard of **house nearby resident**, nine  
173 adult mosquitoes were also collected with aspirator in tire centers where there was a lot of water  
174 accumulated from atmospheric precipitation through the tires, (Figure 1 h, k) and two males  
175 were collected in **the** house with a vegetable garden. We collected 78 adult mosquitoes at four  
176 sampling stations in the gardens with vegetation of residential houses and in a restaurant's garden  
177 for three entomological survey periods with the BG-Sentinel trap. Among them, 38 were **female**  
178 and 39 males (Table 1).

179 Forty-eight eggs were successfully hatched and were reared to adults (18 male/30 female). All  
180 adult mosquitoes were morphologically identified and classified as *Ae. albopictus*. During the  
181 research period, we also identified 115 eggs of *Ae. geniculatus* caught with ovitraps (Table 2)  
182 and 34 adult mosquitoes of *Cx. pipiens s.l.* caught with BG-Sentinel trap. (Table 1).

183

## 184 Discussion

185 The "Asian tiger mosquito", *Ae. albopictus*, originating from Southeast Asia, has undergone a  
186 significant expansion of its range in the last few decades [30].

187 In Europe, the tiger mosquito was first reported in Albania in 1979 [14], than ten years later in  
188 Italy [31], France [32], [33], Spain [34], Belgium [35], Switzerland [36], Greece [37],  
189 Montenegro [18],[38], Croatia [16], Bosnia and Herzegovina [16], Slovenia [16], [39] and North  
190 Macedonia [17]. As in **other** cases [40], [41], it is challenging to speculate when the Tiger  
191 mosquito arrived in these parts of Kosovo, the mosquito had never been reported there before,  
192 probably because **of the low density of *Ae. albopictus* populations did not create a nuisance for**  
193 **the inhabitants, who did not notice its presence. The maritime route is the most likely pathway,**  
194 **given the high percentage of containers and goods transported by ship.** The movement of cars  
195 has helped a lot in distributing *Aedes albopictus* species [42]. The first identification of the tiger  
196 mosquito was made near the border with Albania. It is thought that the way of its introduction  
197 was done through land routes strictly through the movement of vehicles.  
198 Our study reports an established population of the Asian tiger mosquito in the municipality of  
199 Prizren in the Northern part of Kosovo.

200 The ovitraps were selected as a research method due to their high sensitivity to low mosquito  
201 density, low price and practical use in the field [43]. A female tiger mosquito can lay eggs in  
202 several ovitraps placed in different areas; however, it depends on the sites' attractiveness [44].  
203 Ovitrap can help control the mosquito population by eliminating the eggs, which results in a  
204 lower number of mosquitoes [17]. The first *Ae. albopictus* specimen is registered in Zhur, a  
205 village close to the border with Albania. This specimen recorded in a garden with many artificial  
206 breeding places (container- breeding species) adapted to the temperate climate affected by the  
207 Mediterranean climate, channeled from the Adriatic Sea in Albania. **The tiger mosquito it have**  
208 **ability to use both natural and artificial containers for larval habitats facilitates** its widespread  
209 occupation of urban and peri urban environments [30], ensuring a close connection between the  
210 species and the human population, increasing the risk of vector-borne diseases in these areas  
211 [45].

212 The other sampling station, Vërmicë, is the closest to Albania's border, which argues the  
213 significant presence of eggs in the ovitraps and the large number of adults caught with BG-  
214 sentinel trap. **Border zones considered key to the introduction of invasive species.** The number of  
215 cars and other vehicles coming from Albania is vast, so introducing the tiger mosquito through  
216 this road has been indisputable. After that, from the border with Albania continue the highways,



217 Morin-Prizren-Prishtinë it is expected that mosquitoes will spread in other parts of Kosovo,  
218 precisely through the land route. Also, the third sampling station in Vlashnje is characterized by  
219 the significant presence of used tires, which served as the breeding sites for egg release. In the  
220 monitoring station inside the city of Prizren, the number of eggs in ovitraps was high, resulting in  
221 an increased number of adults. This finding shows the ability of the tiger mosquito to adapt to the  
222 environments where humans live. The recording of *Ae. albopictus* on this part of Kosovo is an  
223 important finding, demarcating new boundaries of the distribution range of the species in Europe  
224 and indicating the possibility of this species spreading the risk of diseases that it can bring. In the  
225 Landovica locality located in the periphery of Prizren, we didn't have any egg of mosquito and  
226 based on this, it suggests that the last limit of its spread has been up to this year the city of  
227 Prizren. Also, in Suhareka, we didn't have any egg in the ovitraps, considering that this locality  
228 was about 41 km away from the Albanian border. However, with almost the same climatic  
229 conditions and approximate altitude, the results show that the farthest limit for the spread of the  
230 tiger mosquito is isolated only in the municipality of Prizren for this year.

## 231 **Conclusions**

232 Our results of introducing the tiger mosquito in Kosovo suggest that the Health authorities  
233 should establish a national monitoring system to evaluate the spread of the tiger mosquito in  
234 other regions of the country and prevent the risk of an invasion. Since community involvement  
235 has been very successful in other countries, we suggest that community involvement (citizen  
236 scientists) should be highly encouraged for the early detection of an invasive mosquito species.  
237 Our results show the presence of the tiger mosquito in Kosovo for the first time in June, 2020.  
238 Actually *Ae. albopictus* is located in the southern part of Kosovo, but with the increased intensity  
239 of road transport, it is expected that it will soon spread throughout the country and bring the risk  
240 for Aedes-borne disease. Transmission prevention of this species should be regarded as high  
241 priority for public health authorities in Kosovo.

242

## 243 **Acknowledgments**

244 The work was done within the framework of AIM-COST Action CA17108.

245 We would like to express our gratitude to Prof. Dr Silvia Bino, Head of the Department of  
246 Epidemiology and Control of Infectious Diseases, Institute of Public Health in Tirana, Albania,

247 for her continuous support of our research and Mihaela Kavran that provided papers for research  
248 conducted on Serbia. Ovitrap traps used in this study were provided by ECDC VectorNet project  
249 (framework contract OC/EFSA/AHAW/2013/02-FWC1 funded by the European Food Safety  
250 Authority (EFSA) and the European Centre for Disease prevention and Control (ECDC).

251 We are grateful to Lulzim Alia, geographer from Prishtina, Kosovo, who helps us to prepare the  
252 map of the Figure 3 of this manuscript. We also want to thank the community of the village Zhur  
253 and other localities in Kosovo for their cooperation to provide information on mosquito's  
254 presence and for giving us permission to investigate in their properties during the fieldwork.  
255

## 256 **References**

- 257 1. Medlock JM, Hansford KM, Versteirt V, Cull B, Kampen H, Fontenille D, et al. An  
258 entomological review of invasive mosquitoes in Europe. *Bull Entomol Res.* 2015; 105, 637-663.
- 259 2. Badieritakis E, Papachristos D, Latinopoulos D, Stefopoulou A, Kolimenakis A, Bithas K, et  
260 al. *Aedes albopictus* (Skuse,1895) (Diptera: Culicidae) in Greece: 13 years of living with the  
261 Asian tiger mosquito. 2018 *Parasitol Res.*117, 453-460.[https://doi.org/10.1007/s00436-017-](https://doi.org/10.1007/s00436-017-5721-6)  
262 [5721-6](https://doi.org/10.1007/s00436-017-5721-6)PMid:29275504
- 263 3. Rosen L. Dengue in Greece in 1927 and 1928 and the pathogenesis of dengue hemorrhagic  
264 fever: new data and a different conclusion. *Am J Trop Med Hyg* 1986; 35:642–653.
- 265 4. Mitchell CJ. The role of *Aedes albopictus* as an arboviral vector. *Parassitologia*, 1995 a. **37**,  
266 109-113.
- 267 5. Mitchell CJ, Haramis LD, Karabatsos N, et al. Isolation of La Crosse, Cache Valley, and  
268 Potosi viruses from *Aedes* mosquitoes (Diptera: Culicidae) collected at used-tire sites in Illinois  
269 during 1994–95. *J Med Entomol* 1998;35:573–7.
- 270 6. Gratz NG. Critical review of the vector status of *Aedes albopictus*. *Medical and Veterinary*  
271 *Entomology*, 2004: **18**, 215-227.
- 272 7. Tilston N, Skelly C, and Weinstein P. Pan-European Chikungunya surveillance: Designing  
273 risk stratified surveillance zones. *Int J Health Geog* 2008; 8:61.

- 274 8. World Health Organization (WHO). Comprehensive Guidelines for Prevention and Control of  
275 Dengue and Dengue Haemorrhagic Fever. WHO Regional Publication, South-East Asia Series  
276 1999; 29:196 pp.
- 277 9. Rezza G, Nicoletti L, Angelini R, Romi R, Finarelli A.C, Panning M. Infection with  
278 chikungunya virus in Italy: an outbreak in a temperate region. *Lancet*. 2007; 370:1840–6
- 279 10. Gossner C M, Ducheyne E, & Schaffner F. Increased risk for autochthonous vector-borne  
280 infections transmitted by *Aedes albopictus* in continental Europe. *Eurosurveillance*, 2018;  
281 23(24).
- 282 11. ECDC, 2019 [https://www.ecdc.europa.eu/en/news-events/epidemiological-update-third-case-](https://www.ecdc.europa.eu/en/news-events/epidemiological-update-third-case-locally-acquired-zika-virus-disease-hyeres-france)  
283 [locally-acquired-zika-virus-disease-hyeres-france](https://www.ecdc.europa.eu/en/news-events/epidemiological-update-third-case-locally-acquired-zika-virus-disease-hyeres-france)
- 284 12. Jourdain F, Roiz D, de Valk H, Noël H, L'Ambert G, Franke F, et al. From importation to  
285 autochthonous transmission: Drivers of chikungunya and dengue emergence in a temperate  
286 area. *PLoS neglected tropical diseases*, 2020; 14(5), e0008320.  
287 <https://doi.org/10.1371/journal.pntd.0008320>
- 288 13. Vermeulen TD, Reimerink J, Reusken C, Giron S, & de Vries PJ. Autochthonous dengue in  
289 two Dutch tourists visiting Département Var, southern France, July 2020. *Euro surveillance :*  
290 *bulletin Europeen sur les maladies transmissibles = European communicable disease bulletin*,  
291 2020; 25(39), 2001670. <https://doi.org/10.2807/1560-7917.ES.2020.25.39.2001670>
- 292 14. Adhami J, and Murati N. Prani e mushkonjës *Aedes albopictus* në Shqipëri. *Rev Mjekesore*.  
293 1987; 1:13–6.
- 294 15. Velo E, Kadriaj P, Mersini K, Shukullari A, Manxhari B, Simaku A, et al. Enhancement of  
295 *Aedes albopictus* collection by ovitrap and sticky adult trap. *Parasites & Vectors*. 2016; 9:223  
296 <https://doi.org/10.1186/s13071-016-1501-x> PMID: 27102015
- 297 16. Petric D, Zgomba M, Ignjatovic Cupina A, Pajovic I, Merdic E, Boca I, et al. Invasion of the  
298 *Stegomyia albopicta* to a part of Europe. *Abstracts of the SOVE 15th European Meeting, Serres,*  
299 *Greece*, 2006; p58
- 300 17. Cvetkovikj A, Djadjovski I, Krstevski K, Popova Z, Rashikj L, Atanasova K, et al. New  
301 Records of the Asian Tiger Mosquito (*Aedes albopictus*) in North Macedonia. *Macedonian*  
302 *Veterinary Review*. *Mac Vet Rev* 2020; 43 (2): i-v

- 303 18. Petrić D, Pajović I, Čupina A, and Zgomba M. *Aedes albopictus* in Entomofauna of  
304 Yugoslavia. Symposia of Serbian Entomologist's 2001, Entomological Society of Serbia, Goc.  
305 26–29 September 2001.
- 306 19. Petrić D, Zgomba M, Ignjatović CA, Marinković D, Bellini R, Schaffner F, et al. Invasive  
307 mosquito species in Europe and Serbia, 1979-2011. International Symposium on Current Trends  
308 in Plant Protection. 2012.
- 309 20. ECDC 2014, [http://ecdc.europa.eu/en/healthtopics/vectors/vector-  
310 maps/Pages/VBORNET\\_maps.aspx](http://ecdc.europa.eu/en/healthtopics/vectors/vector-<br/>310 maps/Pages/VBORNET_maps.aspx)
- 311 21. Knudsen AB, Romi R, and Majori G. Occurrence and spread in Italy of *Aedes albopictus*,  
312 with implications for its introduction into other parts of Europe. J Am Mosq Control Assoc 1996;  
313 2:177–183
- 314 22. Medlock JM, Avenell D, Barrass I, Leach S. Analysis of the potential for survival and  
315 seasonal activity of *Aedes albopictus* 760 OTER ET AL. (Diptera: Culicidae) in the United  
316 Kingdom. J Vector Ecol 2006; 31:292–304.
- 317 23. Benedict MQ, Levine R, Hawley WA, & Lounibos P. Spread of the Tiger: Global Risk of  
318 Invasion by the Mosquito *Aedes albopictus* Vector Borne Zoonotic Dis. 2007; 7(1): 76–85.  
319 (<https://doi.org/10.1089/vbz.2006.0562>) PMID: 17417960
- 320 24. Reiter P, and Sprenger D. The used tire trade: a mechanism for the worldwide dispersal of  
321 container breeding mosquitoes. J Am Mosq Control Assoc. 1987; 3: 494–501.
- 322 25. Linthicum KJ, Kramer VL, Madon MB, and Fujioka K. Introduction and potential  
323 establishment of *Aedes albopictus* in California in 2001. J Am Mosq Control Assoc 2003;  
324 19:301–308.
- 325 26. Scholte EJ, Dijkstra E, Blok H, De Vries A, Takken W, Hofhuis A. Accidental importation  
326 of the mosquito *Aedes albopictus* into the Netherlands: a survey of mosquito distribution and the  
327 presence of dengue virus. Med Vet Entomol, 2008; 22:352–358.
- 328 27. Muja-Bajraktari N, Zhushi-Etemi F, Dikolli-Velo E, Kadriaj P, and Gunay F. The  
329 composition, diversity, and distribution of mosquito fauna (Diptera: Culicidae) in Kosovo.  
330 *Journal of Vector Ecology*. 2019; 44 (1): 94-104.
- 331 28. Bellini R, Michaelaki A, Petrić D, Schaffner F, Alten B, Angelini A, et al. Practical  
332 management plan for invasive mosquito species in Europe: I. Asian tiger mosquito (*Aedes*

333 *albopictus*), Travel Medicine and Infectious Disease. 2020;  
334 <https://doi.org/10.1016/j.tmaid.2020.101691>

335 29. Gunay F, Picard M, and Robert V. MosKeyTool, an interactive identification key for  
336 mosquitoes of Euro-Mediterranean. 2018 Version 2.1. [www.medilabsecure.com/moskeytool](http://www.medilabsecure.com/moskeytool). Last  
337 update:01/08/2018.

338 30. Hawley W. The biology of *Aedes albopictus*. *J. Am. Mosq. Contr. Assoc.*, 1988 (Suppl.) 4,  
339 1-39).

340 31. Sabatini A, Ranieri V, Trovato G, and Coluzzi M. *Aedes albopictus* in Italia e possible  
341 diffusione de lla specienell'area mediterranea. *Parassitologia*, 1990: **32**, 301-304.

342 32. Schaffner F, and Karch S. Première observation d'*Aedes albopictus* (Skuse, 1894), en France  
343 métropolitaine. *Sciences de la Vie/Life Sciences*, 2000 : **323**(4), 373-375.

344 33. Schaffner F, Bouletreau B, Guillet B, Guilloteau J, and Karch S. *Aedes albopictus* (Skuse,  
345 1894), established in metropolitan France. *European Mosquito Bulletin*, 2001: **9**, 1-3.

346 34. Roiz D, Eritja R, Escosa R, Lucientes J, Marques E, Melero-Alcibar R, et al. Spreading of  
347 *Aedes albopictus* in Spain. *Abstracts of the SOVE 15<sup>th</sup> European Meeting, Serres, Greece, 2006*:  
348 p60.

349 35. Schaffner F, Van Bortel W, and Coosemans M. First record of *Aedes (Stegomyia) albopictus*  
350 in Belgium. *Journal of the American Mosquito Control Association*, 2004: **20**(2), 201-203.

351 36. Flacio E, Patocchi N, Peduzzi R, and Luethy P. Strategies to stop the establishment of *Aedes*  
352 *albopictus* in Switzerland. *Abstracts of the SOVE15th European Meeting, Serres, Greece, 2006*,  
353 p57.

354 37. Samanidou-Voyadjoglou A, Patsoula E, Spanakos G, and Vakalis NC. Confirmation of  
355 *Aedes albopictus* (Skuse) (Diptera: Culicidae) in Greece. *European Mosquito Bulletin*, 2005:19,  
356 10-11. *Journal of the European Mosquito Control Association* ISSN1460-6127

357 38. Becker N, Petric D, Zgomba M, Boase C, Dahl C, Lane J, at al. Mosquitoes  
358 and Their Control. Kluwer Academic/Plenum Publishers, New York. 2003. ISBN 0-306-  
359 47360-7. pp.498.

360 39. Schaffner F. Updated data on non-indigenous invasive mosquitoes in Europe, with special  
361 reference to France. *Abstracts of the SOVE 15<sup>th</sup> European Meeting, Serres, Greece, 2006* p56.

362 40. Buhagiar JA. A second record of *Aedes (Stegomyia) albopictus* (Diptera: Culicidae) in  
363 Malta. *Eur Mosq Bull.* 2009; **27** : 65–67.

- 364 41. Bengoa M, Delacour-Estrella S, Barceló C, Paredes-Esquivel C, Leza M, and Lucientes J.  
365 First record of *Aedes albopictus* (Skuse, 1894) (Diptera; Culicidae) from Minorca (Balearic  
366 Islands, Spain). *J Eur Mosq Control Ass.* 2016;34:5–9.
- 367 42. Eritja R, Palmer JRB, Sanpera-Calbet DRI, and Bartumeus F. Direct evidence of Adult *Aedes*  
368 *albopictus* Dispersal by Car. *Scientific Reports* 2017 | 7: 14399 | DOI:10.1038/s41598-017-  
369 12652-5. Article number: 14399
- 370 43. Carrieri M, Albieri A, Angelini P, Baldacchini F, Venturelli C, Zeo S.M, et al. Surveillance  
371 of the chikungunya vector *Aedes albopictus* (Skuse) in Emilia-Romagna (northern Italy):  
372 Organizational and technical aspects of a largescale monitoring system. *J Vector Ecol.* 2011; 36,  
373 108-116.
- 374 44. Manica M, Filipponi F, D’Alessandro A, Screti A, Neteler M, Rosà R, et al. Spatial and  
375 temporal hot spots of *Aedes albopictus* abundance inside and outside a South European  
376 metropolitan area. *PLoS Negl Trop Dis.* 2016; 10, 1-17. PMID:27333276 PMCID: PMC4917172
- 377 45. Takken W, and Knols B GJ. *Emerging Pests and Vector-Borne Diseases in Europe*, vol. 1.  
378 The Netherlands: Wageningen Academic Publishers, 2007:499 pp.



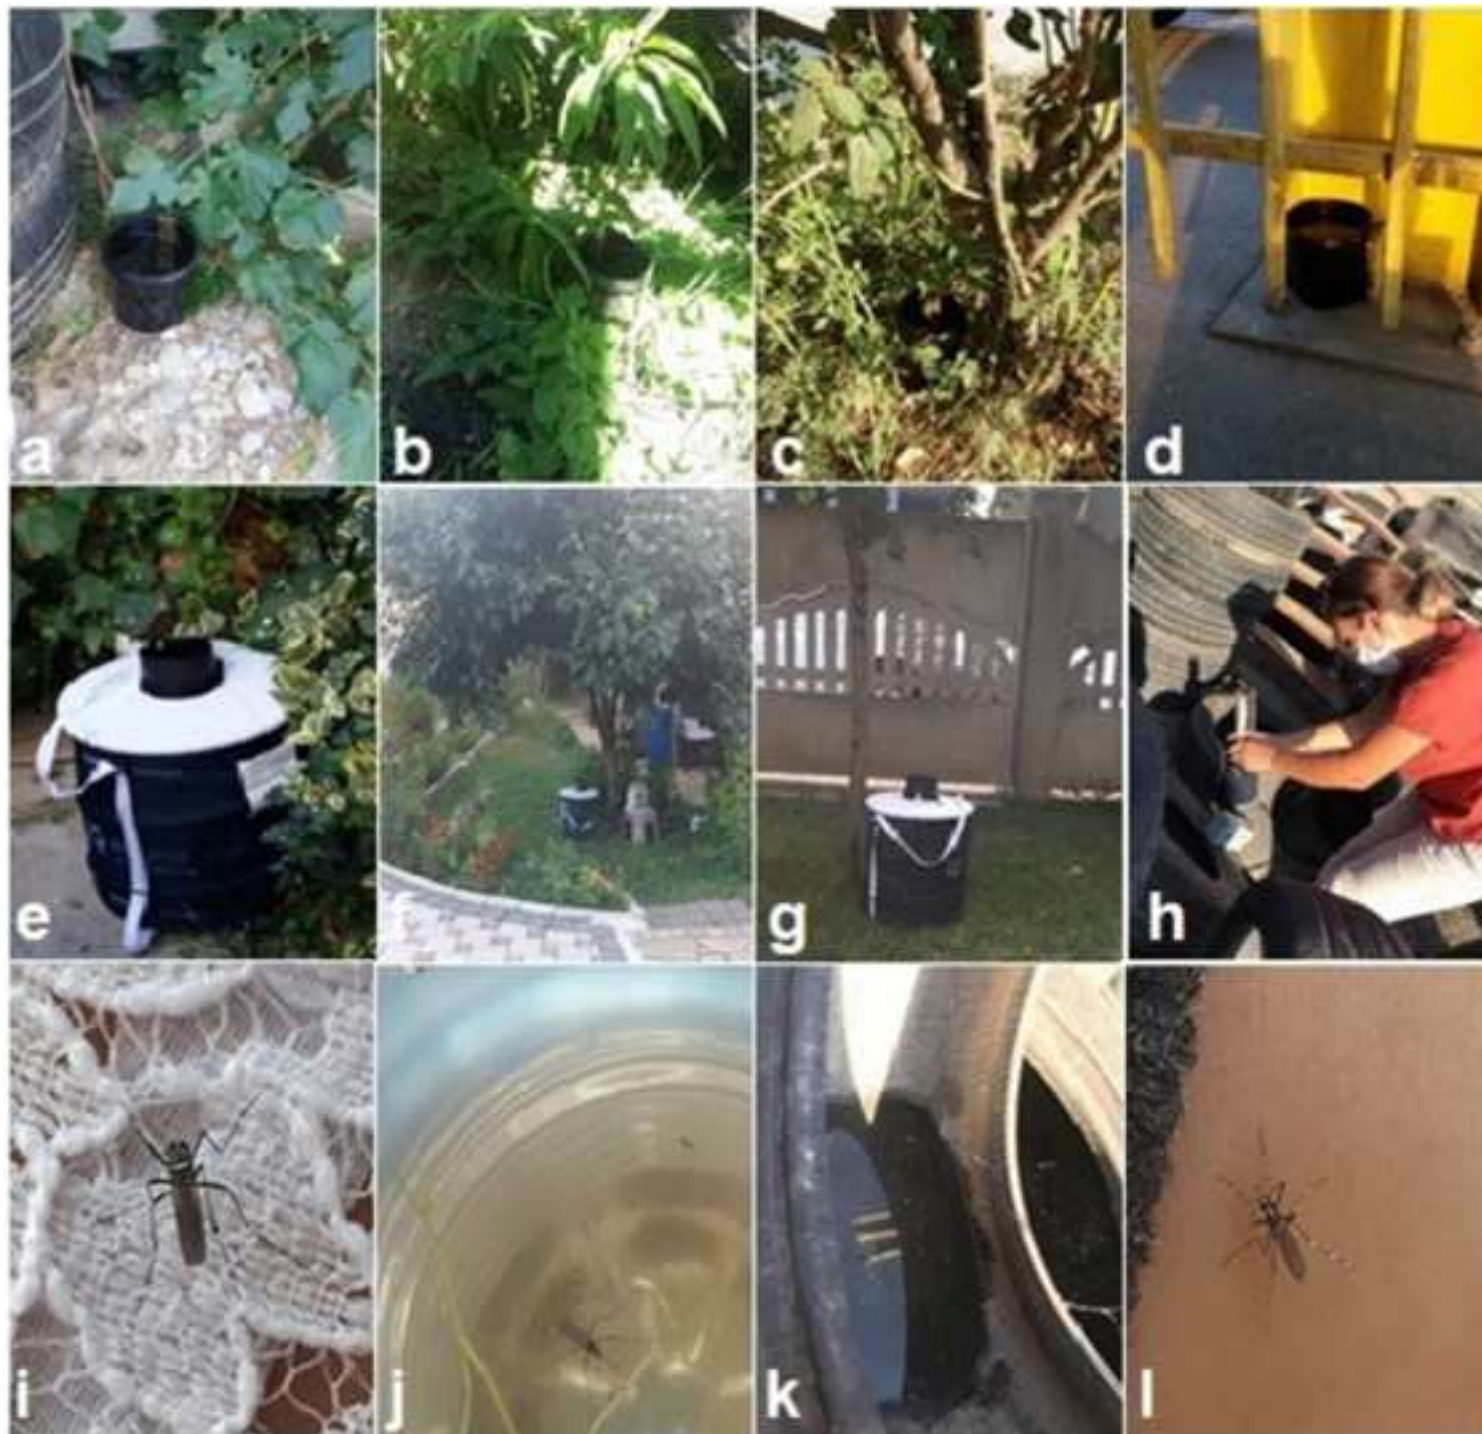

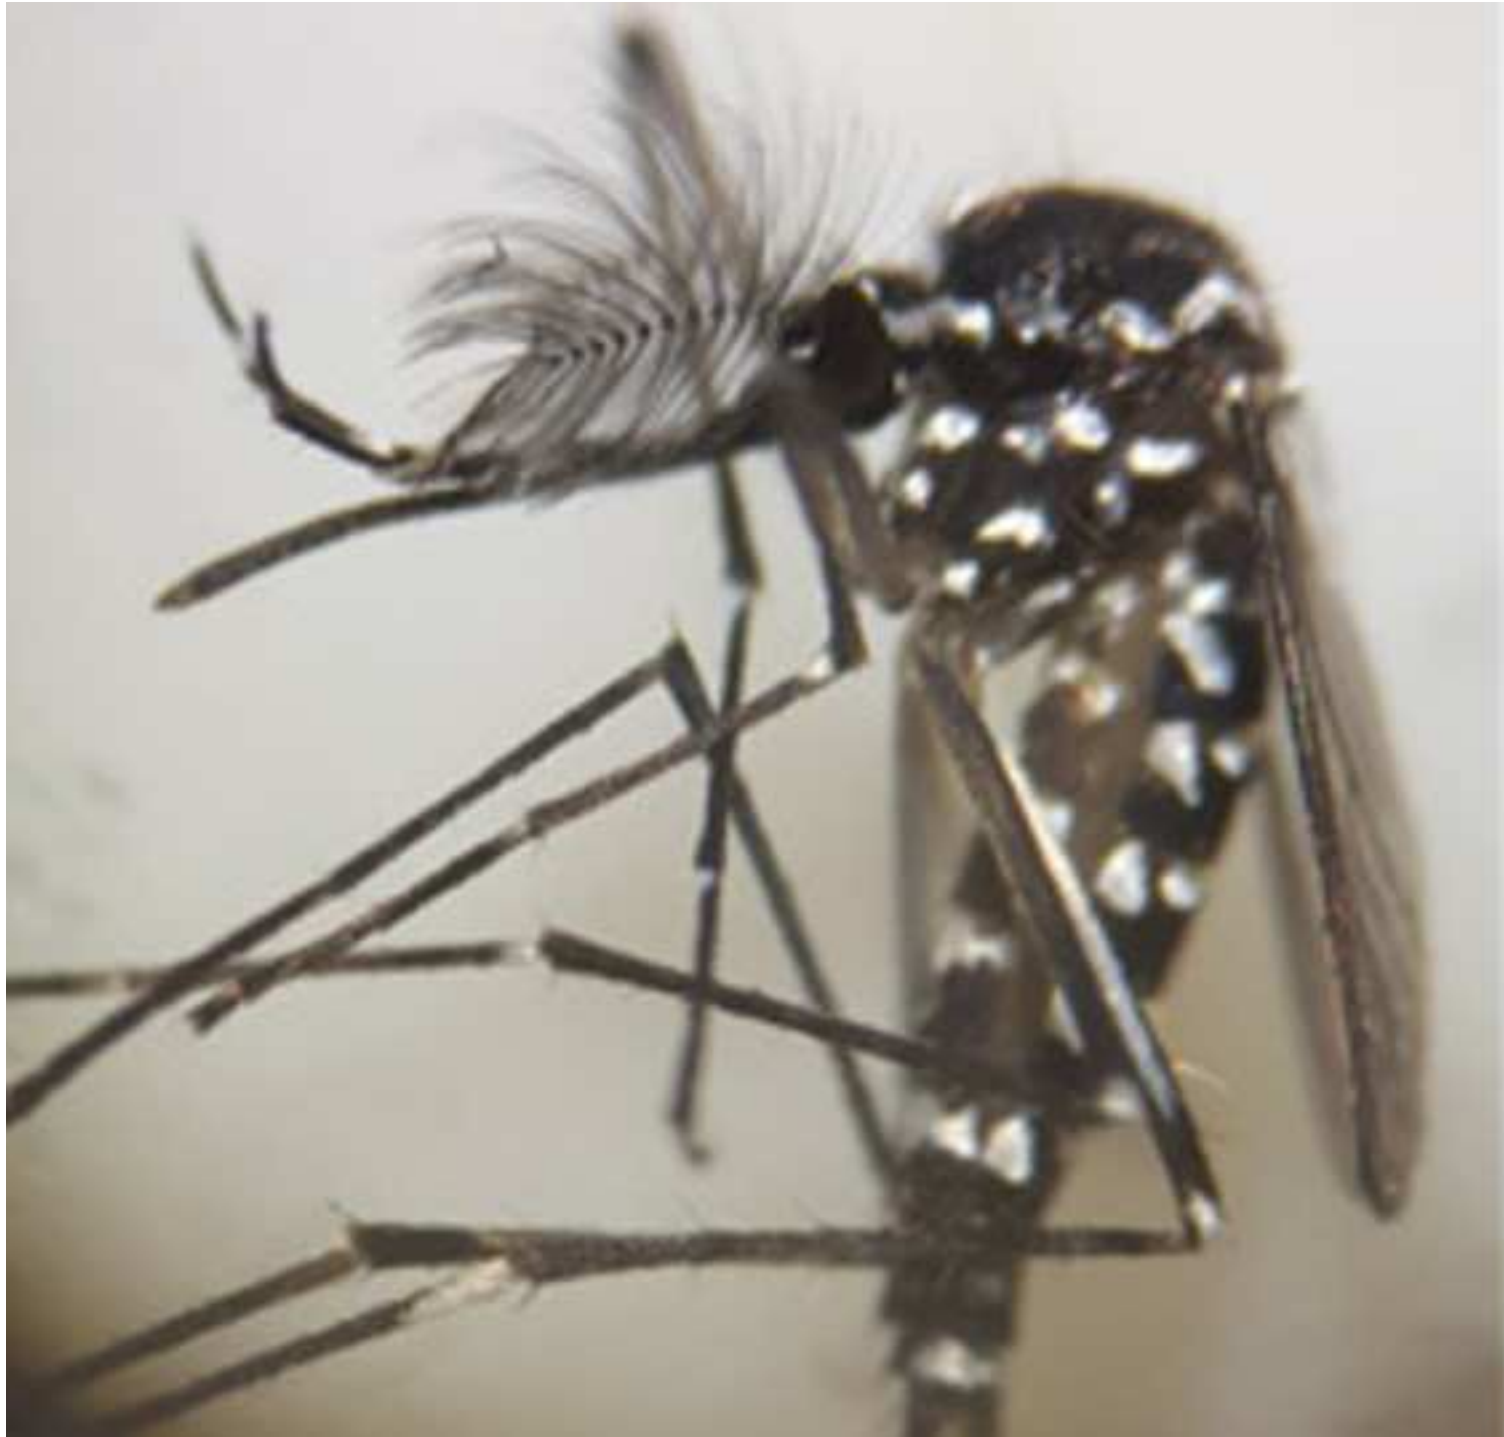



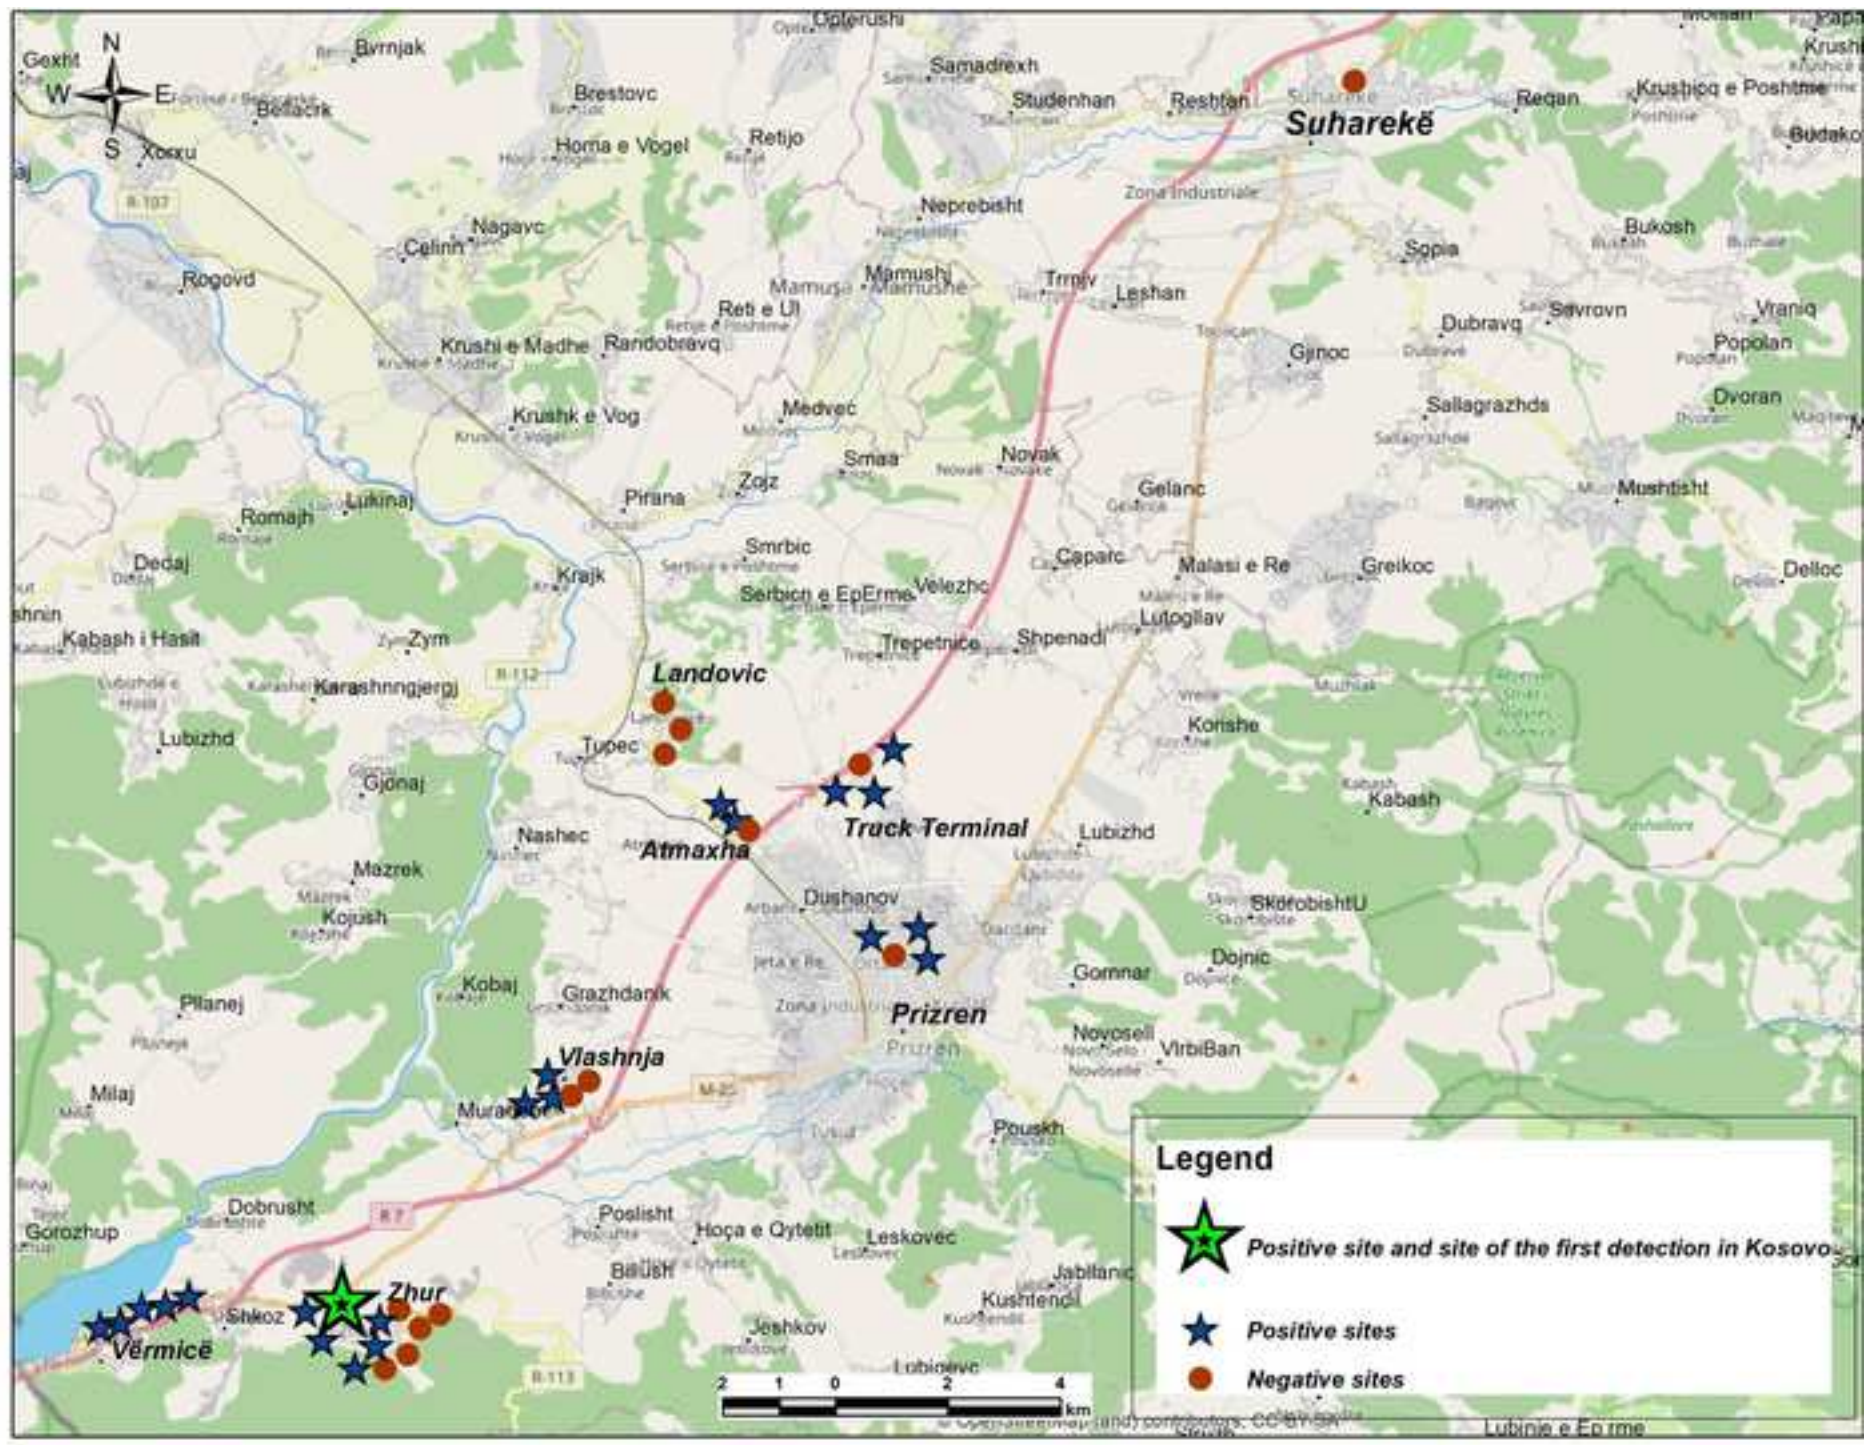

Supplement: pone.0264300.s002.pdf [file pone.0264300.s002.pdf]
